# Supplementary material for: Magnetic fluorescent bifunctional spin-crossover complexes
Source: Royal Society of Chemistry journal article supplement (doi:10.1039/c6dt03714c), 2016-01-01
Supplement: c6dt03714c1.pdf [file c6dt03714c1.pdf]

## **Magnetic fluorescent bifunctional spin–crossover complexes**

**Jun–Li Wang, Qiang Liu, Xiao–Jin Lv, Rui–Lin Wang, Chun–Ying Duan and  
Tao Liu\***

*<sup>1</sup>State Key Laboratory of Fine Chemicals, Dalian University of Technology, 2  
Linggong Road, Dalian 116024, China.*

Correspondence and requests for materials should be addressed to L.T.

(liutao@dlut.edu.cn)

**Table S1. Selected bond angles (°) for [Fe(L)<sub>2</sub>(NCS)<sub>2</sub>] at 282 K**

---

| Bond angles (°)   |           |                   |           |
|-------------------|-----------|-------------------|-----------|
| N(1A)-Fe(1)-N(1)  | 180.0     | N(1A)-Fe(1)-N(3A) | 87.52(9)  |
| N(1)-Fe(1)-N(3A)  | 92.48(9)  | N(1A)-Fe(1)-N(3)  | 92.48(9)  |
| N(1)-Fe(1)-N(3)   | 87.52(9)  | N(3A)-Fe(1)-N(3)  | 180.0     |
| N(1A)-Fe(1)-N(2A) | 87.15(9)  | N(1)-Fe(1)-N(2A)  | 92.85(9)  |
| N(3A)-Fe(1)-N(2A) | 74.51(8)  | N(3)-Fe(1)-N(2A)  | 105.49(8) |
| N(1A)-Fe(1)-N(2)  | 92.85(9)  | N(1)-Fe(1)-N(2)   | 87.15(9)  |
| N(3A)-Fe(1)-N(2)  | 105.49(8) | N(3)-Fe(1)-N(2)   | 74.51(8)  |
| N(2A)-Fe(1)-N(2)  | 180.00(9) |                   |           |

---

Symmetry code A:  $-x + 1, -y + 1, -z + 1$ .

**Table S2. Selected bond angles (°) for [Fe(L)<sub>2</sub>(NCS)<sub>2</sub>] at 90 K**

| Bond angles (°)   |           |                   |           |
|-------------------|-----------|-------------------|-----------|
| N(1A)-Fe(1)-N(1)  | 180.0     | N(1A)-Fe(1)-N(3A) | 87.05(6)  |
| N(1)-Fe(1)-N(3A)  | 92.95(6)  | N(1A)-Fe(1)-N(3)  | 92.95(6)  |
| N(1)-Fe(1)-N(3)   | 87.05(6)  | N(3A)-Fe(1)-N(3)  | 180.0     |
| N(1A)-Fe(1)-N(2)  | 92.59(6)  | N(1)-Fe(1)-N(2)   | 87.41(6)  |
| N(3A)-Fe(1)-N(2)  | 104.43(6) | N(3)-Fe(1)-N(2)   | 75.58(6)  |
| N(1A)-Fe(1)-N(2A) | 87.41(6)  | N(1)-Fe(1)-N(2A)  | 92.59(6)  |
| N(3A)-Fe(1)-N(2A) | 75.58(6)  | N(3)-Fe(1)-N(2A)  | 104.43(6) |
| N(2)-Fe(1)-N(2A)  | 180.00(7) |                   |           |

Symmetry code A:  $-x + 1, -y + 1, -z + 1$ .

**Table S3. Selected bond angles (°) for [Fe(L)<sub>2</sub>(NCSe)<sub>2</sub>] at 298 K**

---

| Bond angles (°)   |           |                   |           |
|-------------------|-----------|-------------------|-----------|
| N(1A)-Fe(1)-N(1)  | 180.0     | N(1A)-Fe(1)-N(3A) | 85.38(8)  |
| N(1)-Fe(1)-N(3A)  | 94.62(8)  | N(1A)-Fe(1)-N(3)  | 94.62(8)  |
| N(1)-Fe(1)-N(3)   | 85.38(8)  | N(3A)-Fe(1)-N(3)  | 180.0     |
| N(1A)-Fe(1)-N(2)  | 89.57(7)  | N(1)-Fe(1)-N(2)   | 90.43(7)  |
| N(3A)-Fe(1)-N(2)  | 105.20(6) | N(3)-Fe(1)-N(2)   | 74.80(6)  |
| N(1A)-Fe(1)-N(2A) | 90.44(7)  | N(1)-Fe(1)-N(2A)  | 89.57(7)  |
| N(3A)-Fe(1)-N(2A) | 74.80(6)  | N(3)-Fe(1)-N(2A)  | 105.20(6) |
| N(2)-Fe(1)-N(2A)  | 180.0     |                   |           |

---

Symmetry code A:  $-x + 1, -y + 2, -z + 1$

**Table S4. Selected bond angles (°) for [Fe(L)<sub>2</sub>(NCSe)<sub>2</sub>] at 90 K**

---

| Bond angles (°)   |            |                   |            |
|-------------------|------------|-------------------|------------|
| N(1)-Fe(1)-N(1A)  | 180.00(10) | N(1)-Fe(1)-N(3)   | 85.46(9)   |
| N(1A)-Fe(1)-N(3)  | 94.54(9)   | N(1)-Fe(1)-N(3A)  | 94.54(9)   |
| N(1A)-Fe(1)-N(3A) | 85.46(9)   | N(3)-Fe(1)-N(3A)  | 180.00(10) |
| N(1)-Fe(1)-N(2)   | 90.06(8)   | N(1A)-Fe(1)-N(2)  | 89.93(8)   |
| N(3)-Fe(1)-N(2)   | 79.62(9)   | N(3A)-Fe(1)-N(2)  | 100.38(9)  |
| N(1)-Fe(1)-N(2A)  | 89.93(8)   | N(1A)-Fe(1)-N(2A) | 90.06(8)   |
| N(3)-Fe(1)-N(2A)  | 100.38(9)  | N(3A)-Fe(1)-N(2A) | 79.62(9)   |
| N(2)-Fe(1)-N(2A)  | 180.00(13) |                   |            |

---

Symmetry code A:  $-x + 1, -y + 2, -z + 1$

**Table S5 Hydrogen bonding and  $\pi$ - $\pi$  interactions [ $\text{\AA}$ ] at two temperatures for 1**

| Temperatur<br>e | D-H...A         | d(D...A)/ $\text{\AA}$                         | $\angle$ D-H...A/ $^\circ$ |
|-----------------|-----------------|------------------------------------------------|----------------------------|
| 282 K           | C5-H5...N6      | 2.998(4)                                       | 122.00                     |
|                 | C14-H14...S1B   | 3.270(3)                                       | 123.00                     |
|                 | C14-H14...N7    | 2.955(3)                                       | 109.00                     |
|                 | $\pi$ ... $\pi$ | d(center...center)/ $\text{\AA}$<br>4.0506(18) |                            |
| 90 K            | C5-H5...N6      | 3.001(3)                                       | 121.00                     |
|                 | C14-H14...S1B   | 3.2075(19)                                     | 119.00                     |
|                 | C14-H14...N7    | 2.940(2)                                       | 110.00                     |
|                 | $\pi$ ... $\pi$ | d(center...center)/ $\text{\AA}$<br>3.9738(12) |                            |

Symmetry code B: x, y, -1 + z

**Table S6 Hydrogen bonding and  $\pi$ - $\pi$  interactions [ $\text{\AA}$ ] at two temperatures for 2**

| Temperatur<br>e | D-H...A         | d(D...A)/ $\text{\AA}$                         | $\angle$ D-H...A/ $^\circ$ |
|-----------------|-----------------|------------------------------------------------|----------------------------|
| 298 K           | C5-H5...N6      | 3.042(3)                                       | 119.00                     |
|                 | C9-H9...N7      | 3.071(3)                                       | 113.00                     |
|                 | $\pi$ ... $\pi$ | d(center...center)/ $\text{\AA}$<br>3.749(2)   |                            |
| 90 K            | C2-H2...N4B     | 3.122(3)                                       | 142.00                     |
|                 | C5-H5...N6      | 3.061(3)                                       | 119.00                     |
|                 | C14-H14...Se1C  | 3.679(3)                                       | 133.00                     |
|                 | C14-H14...N7    | 3.032(4)                                       | 117.00                     |
|                 | $\pi$ ... $\pi$ | d(center...center)/ $\text{\AA}$<br>3.6463(19) |                            |

Symmetry code B:  $-x + 1, -y + 2, -z + 1$ ; C:  $x, y - 1, z$

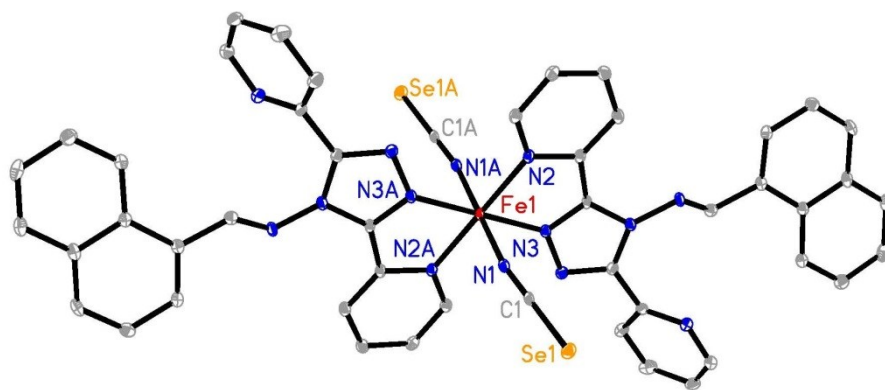

**Fig. S1** ORTEP view of crystal structure of complex **2** at 90 K with the 30% probability thermal ellipsoid. Hydrogen atoms are omitted for clarity. Symmetry code A:  $-x + 1, -y + 2, -z + 1$ .



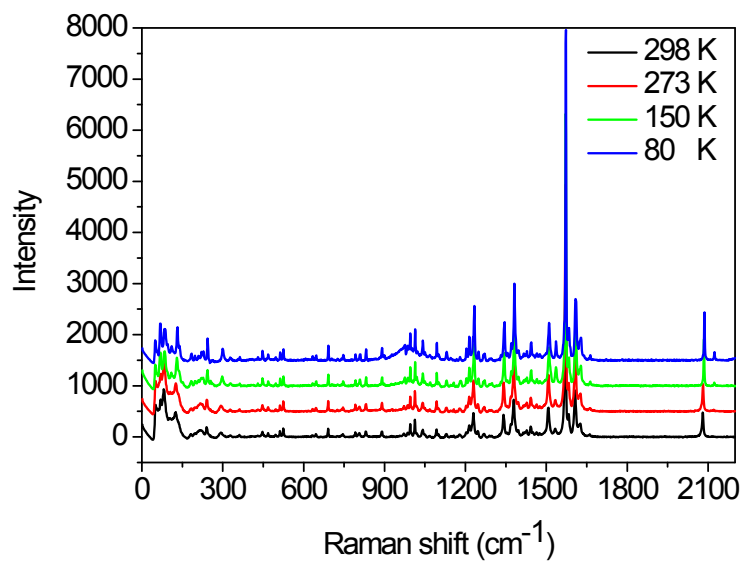

(a)

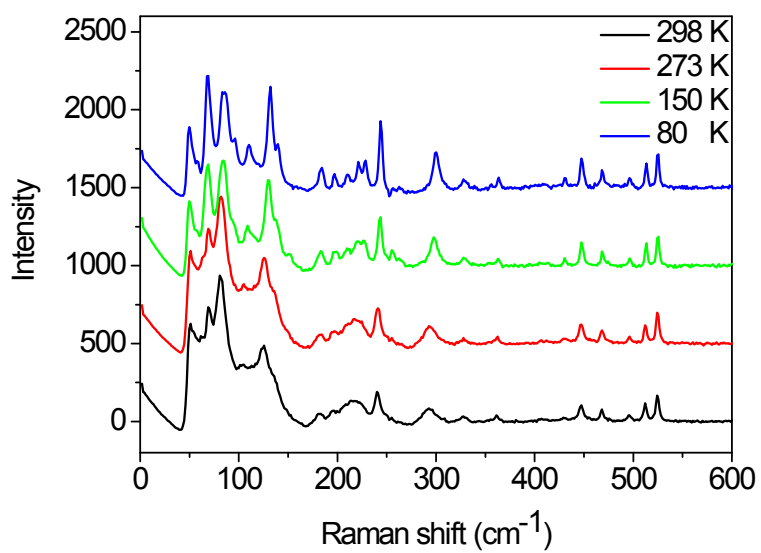

(b)

Fig. S2 Raman spectra ( $\lambda_{\text{ex}} = 633 \text{ nm}$ ) for **1** in wavenumber region 0–2200 cm<sup>-1</sup> (a) and 0–600 cm<sup>-1</sup> (b) at different temperatures.

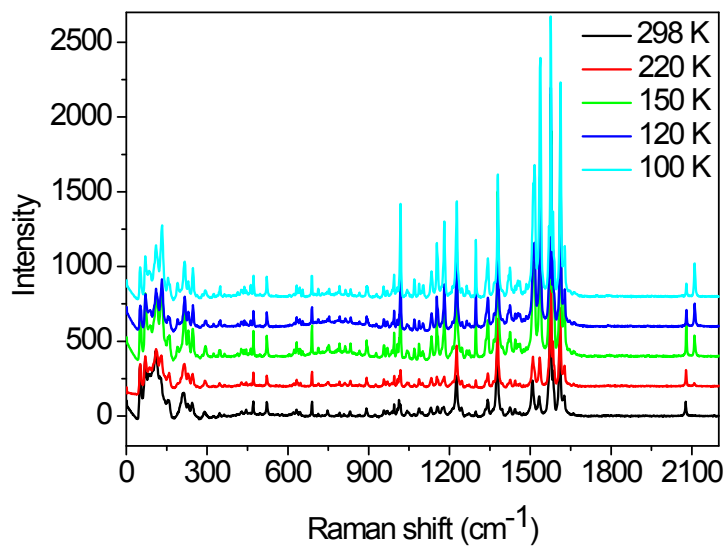

(a)

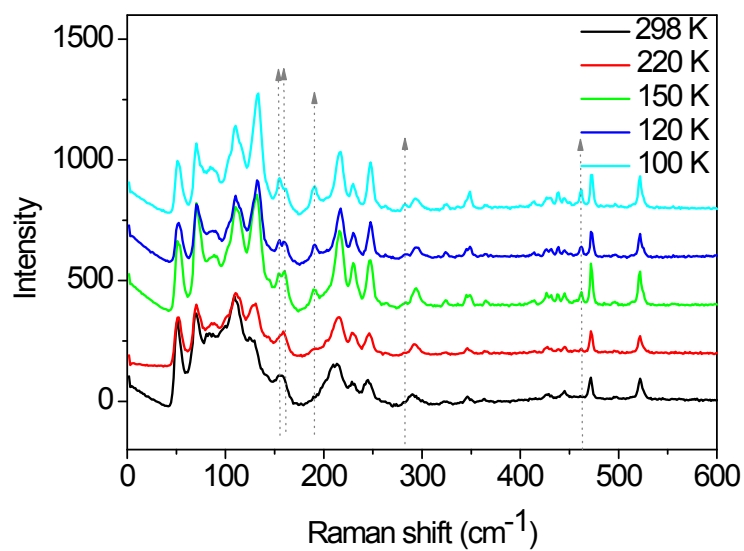

(b)

Fig. S3 Raman spectra ( $\lambda_{\text{ex}} = 633 \text{ nm}$ ) for **2** in wavenumber region 0–2200 cm<sup>-1</sup> (a) and 0–600 cm<sup>-1</sup> (b) at different temperatures.

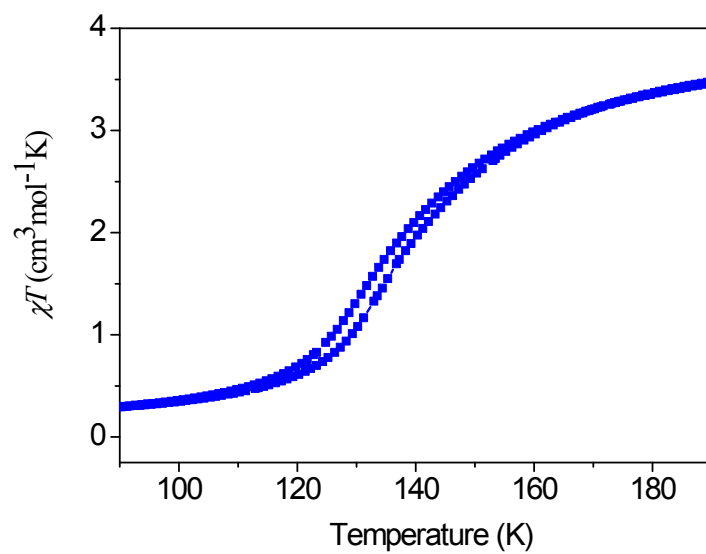

**Fig. S4** Temperature dependence susceptibilities of complex **2** with a hysteresis loop before irradiation.

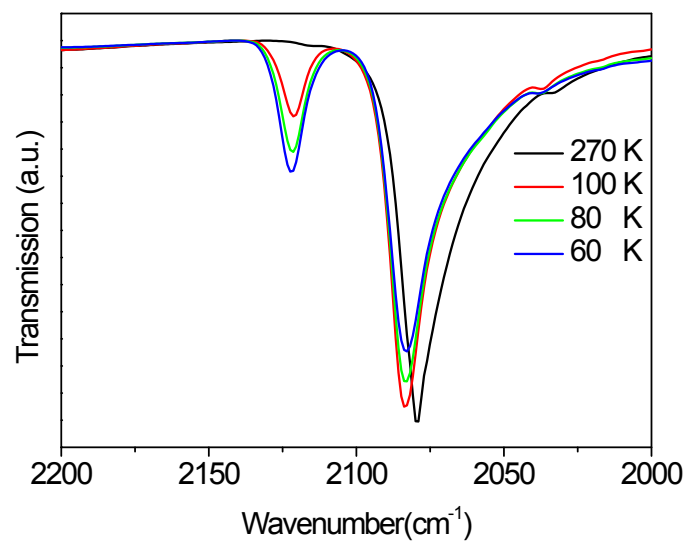

**Fig. S5** Variable temperature solid state infrared spectra for **1** before irradiation.

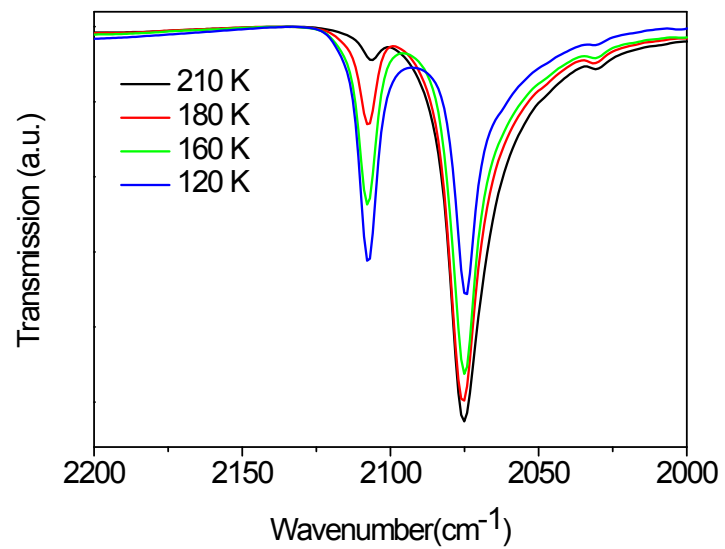

**Fig. S6** Variable temperature solid state infrared spectra for **2** before irradiation.

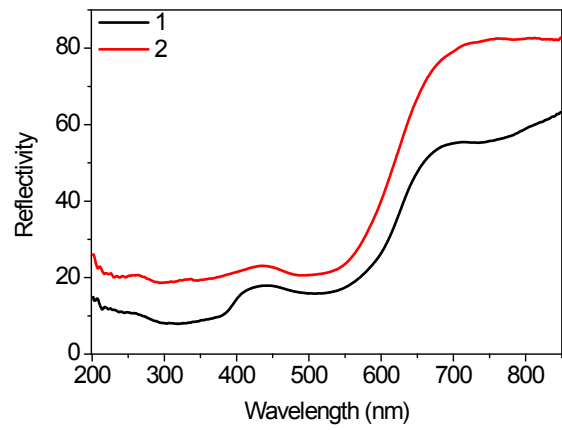

Fig.S7 Solid optical reflectivity spectra for **1** and **2**.

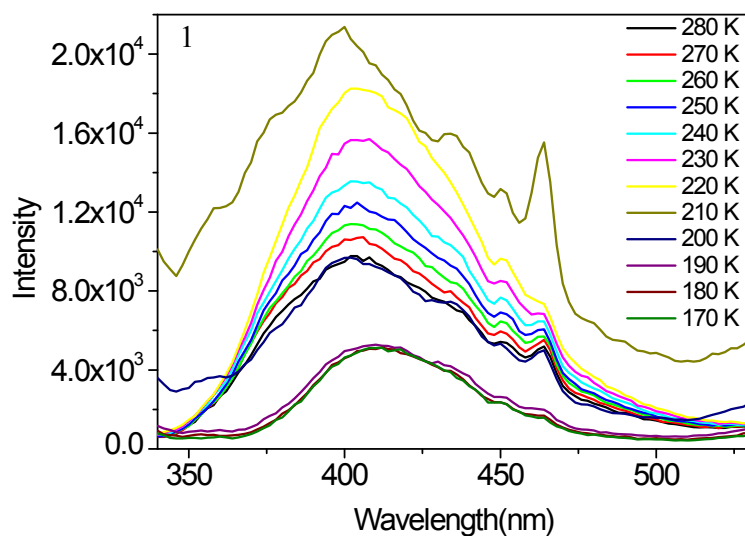

Fig.S8 Temperature-dependent fluorescence emission spectra between 280 K and 170 K for **1**.

Above 220 K, the fluorescence intensities exhibit a strong dependence on temperature. At 210 K, a drastic change is found in fluorescence spectrum shape, indicating glycol starts to solidify. The emission intensity drastically decreases at 200 K due to the weak transmission of light of glycol in solid state. The emission intensities mainly remain constant between 190 K and 170 K, indicative of the complete solidification of glycol.
